# Supplementary material for: Effects of an Arbuscular Mycorrhizal Fungus on the Growth of and Cadmium Uptake in Maize Grown on Polluted Wasteland, Farmland and Slopeland Soils in a Lead-Zinc Mining Area
Source: MDPI journal article supplement (doi:10.3390/toxics10070359), 2022-06-30
Supplement: s1 [file s1]

# Supplementary Materials: Effects of AMF on the growth of and cadmium uptake in maize grown on polluted wasteland, farmland and slopeland soils in a lead-zinc mining area

Jiaxin Chen<sup>1</sup>, Jianfang Guo<sup>1</sup>, Zuran Li<sup>2</sup>, Xinran Liang<sup>1</sup>, Yihong You<sup>1</sup>, Mingrui Li<sup>1</sup>, Yongmei He<sup>1</sup> and Fangdong Zhan<sup>1\*</sup>

<sup>1</sup> College of Resources and Environment, Yunnan Agricultural University, Kunming 650201, Yunnan, China

<sup>2</sup> College of Horticulture and Landscape, Yunnan Agricultural University, Kunming 650201, China

\* Correspondence: zfd97@ynau.edu.cn

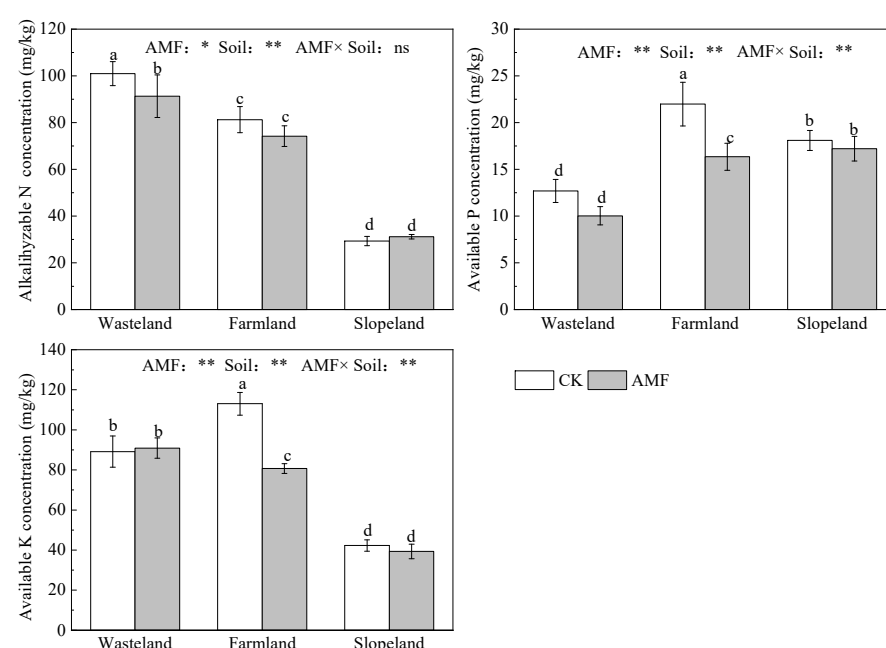

**Figure S1.** Effects of AMF on the concentrations of available nutrients in soil. The different lower-case letters indicate significant differences among treatments; “\*”, and “\*\*” mean  $p < 0.05$  and  $p < 0.01$  according to two-way ANOVA, respectively.

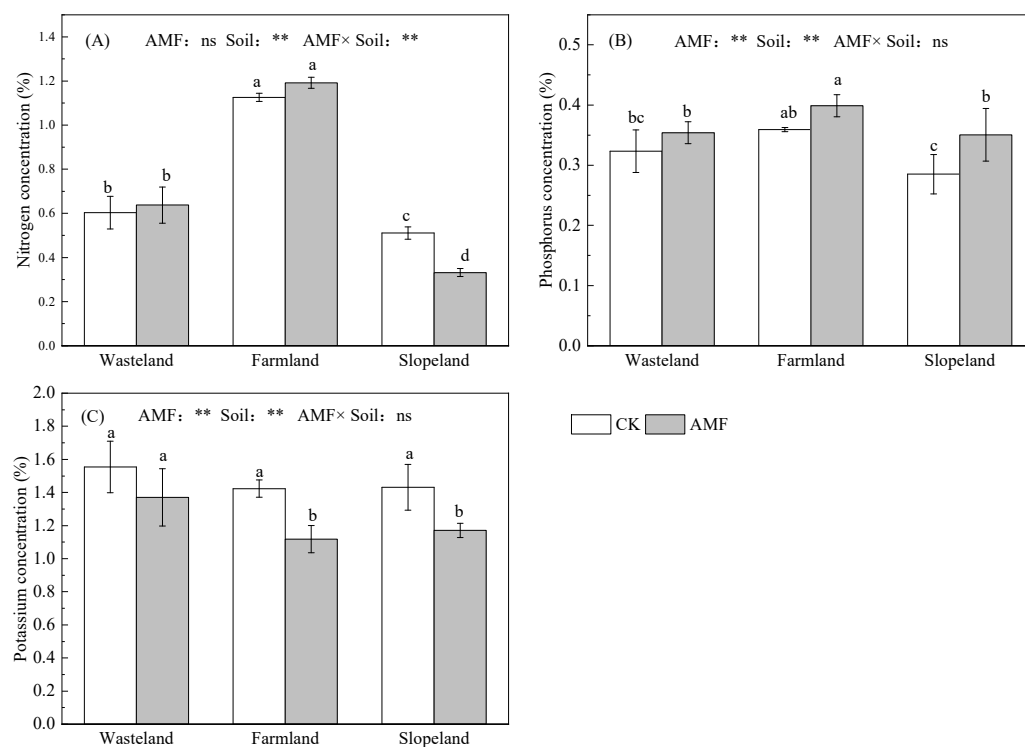

**Figure S2.** Effects of AMF on the concentrations of nitrogen, phosphorus and potassium in the shoots of maize. The different lowercase letters indicate significant differences among treatments; “\*”, and “\*\*” mean  $p < 0.05$  and  $p < 0.01$  according to two-way ANOVA, respectively.

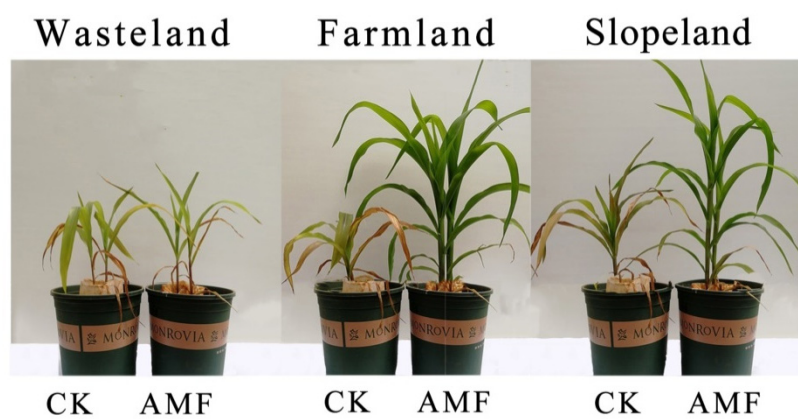

**Figure S3.** Growth of control and AMF-inoculated maize on wasteland, farmland, and slopeland soils.
